# Supplementary material
Source: publisher site journal article supplement (doi:10.18632/aging.206398)
Supplement: Supplementary file 2 [file aging-v18i1-206398-supplementary-material-SD1.pdf]

# SUPPLEMENTARY FIGURE

**A**

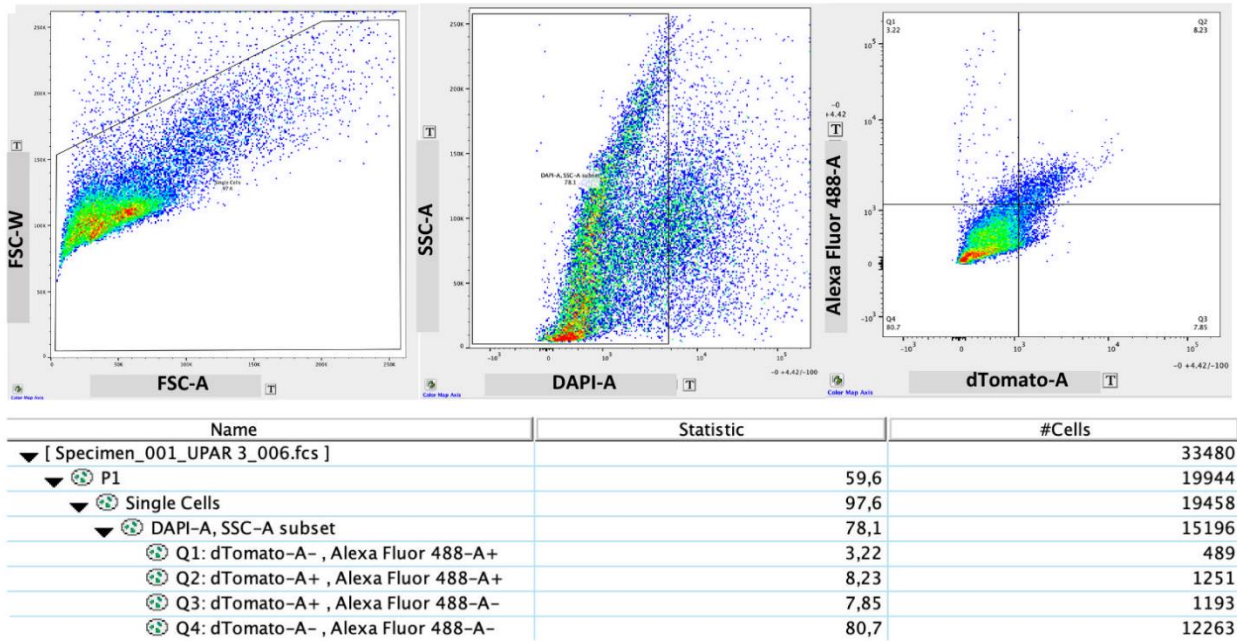

**B**

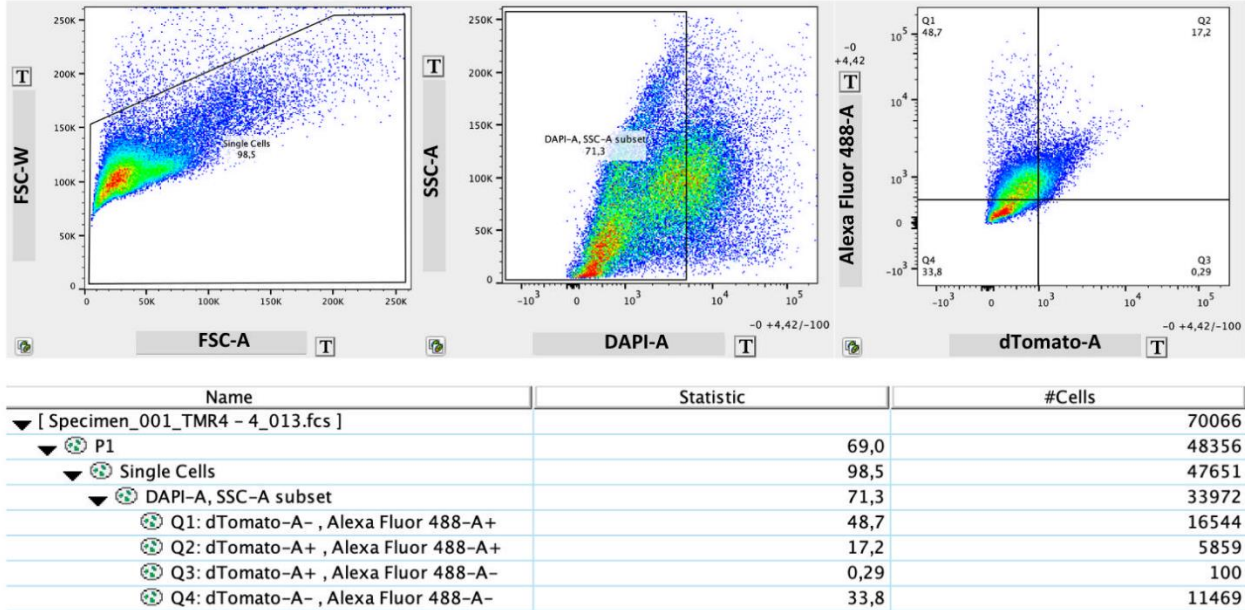

**Supplementary Figure 1. Flow cytometry gating strategy for identifying senescent  $\beta$ -cells in P21-tdTomato mice.** Gating strategy used to quantify uPAR<sup>+</sup> (A) and TM4SF1<sup>+</sup> cells (B) within a population of TdTomato<sup>+</sup>  $\beta$ -cells from P21-tdTomato reporter mice (8-18 months of age, n = 6). TdTomato expression are a label of p21+ cells.
