# Supplementary material
Source: publisher site journal article supplement (doi:10.18632/aging.206398)
Supplement: Supplementary file 3 [file aging-v18i1-206398-supplementary-material-SD2.pdf]

## SUPPLEMENTARY TABLE

Supplemental Table 1. Donor information for human pancreatic samples.

| Subject ID | Age | Gender | BMI  | T2DM | Applications |
|------------|-----|--------|------|------|--------------|
| 1          | 66  | M      | 37.4 | No   | Staining     |
| 2          | 70  | M      | 21   | No   | Staining     |
| 3          | 67  | F      | 24.8 | No   | Staining     |
| 5          | 41  | M      | 28   | No   | FACS, ELISA  |
